# Supplementary material for: The effect of adherence to spectacle wear on early developing literacy: a longitudinal study based in a large multiethnic city, Bradford, UK
Source: PubMed Central journal article supplement (PMC6009541; doi:10.1136/bmjopen-2017-021277), 2018-06-12
Supplement: bmjopen-2017-021277supp002.pdf [file bmjopen-2017-021277supp002.pdf]

## Supplementary Information 2

### Associations between Letter-ID score and refractive error types.

| <b>FACTOR</b>                | <b>FULLY ADJUSTED<br/>MODEL<br/>(95% CI)</b> | <b>p value</b> |
|------------------------------|----------------------------------------------|----------------|
| Constant                     | -21.4 (-29.0 to -13.8)                       | <0.001         |
| Age                          | 1.32 (1.23 to 1.41)                          | <0.001         |
| Age squared                  | -0.021 (-0.023 to -0.018)                    | <0.001         |
| <b>Astigmatism</b>           | <b>-0.329 (-0.933 to 0.275)</b>              | <b>0.286</b>   |
| <b>Hypermetropia</b>         | <b>-1.071 (-2.586 to 0.444)</b>              | <b>0.166</b>   |
| <b>Myopia</b>                | <b>1.386 (-2.953 to 5.275)</b>               | <b>0.531</b>   |
| <b>Low hypermetropia</b>     | <b>0.255 (-0.835 to 1.344)</b>               | <b>0.647</b>   |
| Letter ID baseline (Year 1)  | 0.346 (0.323 to 0.369)                       | <0.001         |
| BPVS                         | 0.024 (0.004 to 0.044)                       | 0.019          |
| Ethnicity                    |                                              |                |
| Pakistani heritage           | 0.569 (-0.128 to 1.267)                      | 0.11           |
| Other                        | 1.057 (0.037 to 2.078)                       | 0.042          |
| Gender                       |                                              |                |
| Female                       | 0.667 (0.102 to 1.232)                       | 0.021          |
| Birth weight (per 100g)      | 0.074 (0.007 to 0.14)                        | 0.029          |
| Gestational age (weeks)      | -0.04 (-0.244 to 0.163)                      | 0.698          |
| Receiving Benefits           | -0.011 (-0.588 to 0.565)                     | 0.969          |
| Mothers Level of Education   |                                              |                |
| (higher than A-level)        | 0.717 (0.11 to 1.325)                        | 0.021          |
| Mothers age at birth (years) | -0.054 (-0.107 to -0.002)                    | 0.042          |
