# Supplementary material for: The effect of adherence to spectacle wear on early developing literacy: a longitudinal study based in a large multiethnic city, Bradford, UK
Source: PubMed Central journal article supplement (PMC6009541; doi:10.1136/bmjopen-2017-021277), 2018-06-12

### Supplementary Information 3

Correlation between near and distance visual acuity (Right Eye) at Time Point Three.

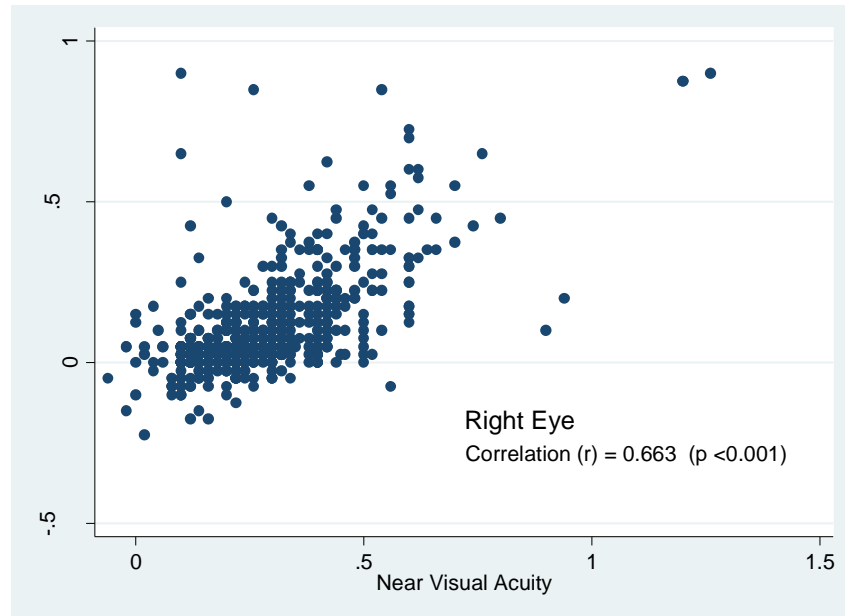

Correlation between near and distance visual acuity (Left Eye) at Time Point Three.

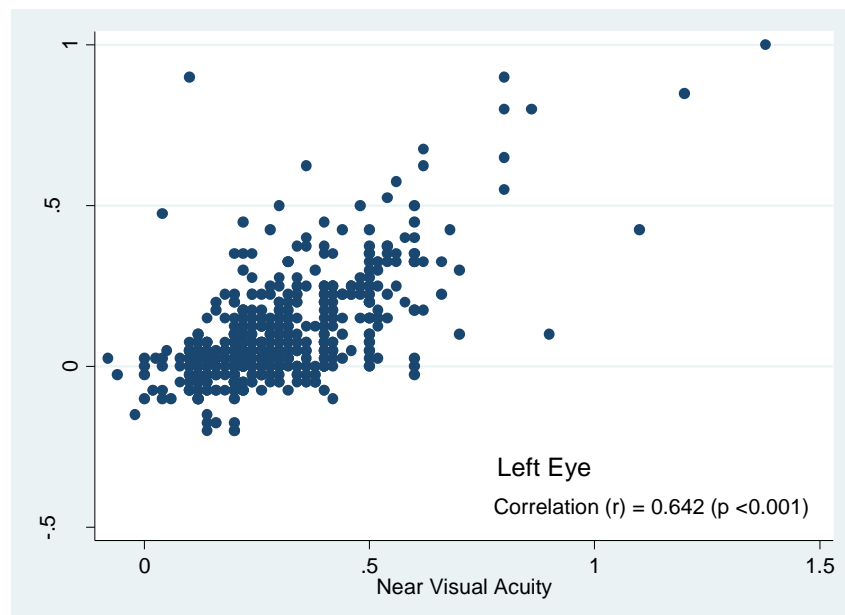

Supplement: bmjopen-2017-021277supp003.pdf [file bmjopen-2017-021277supp003.pdf]
