# Supplementary material for: The effect of adherence to spectacle wear on early developing literacy: a longitudinal study based in a large multiethnic city, Bradford, UK
Source: PubMed Central journal article supplement (PMC6009541; doi:10.1136/bmjopen-2017-021277), 2018-06-12
Supplement: bmjopen-2017-021277supp004.pdf [file bmjopen-2017-021277supp004.pdf]

#### Supplementary Information 4.

Association between visual acuity (distance) and literacy, and between visual acuity (near) and literacy.

|                                  | <b>Correlation with Letter ID<br/>standardised score at T3</b> |                |
|----------------------------------|----------------------------------------------------------------|----------------|
|                                  | <b>r</b>                                                       | <b>p-value</b> |
| Visual Acuity (far) - Best eye   | -0.145                                                         | < 0.001        |
| Visual Acuity (far) - Worst eye  | -0.183                                                         | < 0.001        |
| Visual Acuity (near) – Best eye  | -0.115                                                         | 0.006          |
| Visual Acuity (near) - Worst eye | -0.140                                                         | < 0.001        |
